# Supplementary material for: Liver blood marker testing in UK primary care: a UK wide cohort study, 2004–2016
Source: HighWire-hosted journal article supplement (doi:10.1136/bmjopen-2021-058967), 2022-09-01

Supplementary Table S1 – Codes

|                                                                                                                                                                                                                                                                                                                                      |                                                               |         |                                                             |
|--------------------------------------------------------------------------------------------------------------------------------------------------------------------------------------------------------------------------------------------------------------------------------------------------------------------------------------|---------------------------------------------------------------|---------|-------------------------------------------------------------|
| <b>Liver blood tests</b> and their values were identified from the CPRD “test” dataset using the following entity file codes: ALT = 155; AST = 156; ALP = 153; GGT = 172; Bilirubin = 158; Platelet count = 189.                                                                                                                     |                                                               |         |                                                             |
| <b>Type 2 diabetes</b>                                                                                                                                                                                                                                                                                                               |                                                               |         |                                                             |
| C100112                                                                                                                                                                                                                                                                                                                              | Non-insulin dependent diabetes mellitus                       | C109200 | Non-insulin-dependent diabetes mellitus with neuro comps    |
| C107400                                                                                                                                                                                                                                                                                                                              | NIDDM with peripheral circulatory disorder                    | C109211 | Type II diabetes mellitus with neurological complications   |
| C109.00                                                                                                                                                                                                                                                                                                                              | Non-insulin dependent diabetes mellitus                       | C109212 | Type 2 diabetes mellitus with neurological complications    |
| C109.11                                                                                                                                                                                                                                                                                                                              | NIDDM - Non-insulin dependent diabetes mellitus               | C109300 | Non-insulin-dependent diabetes mellitus with multiple comps |
| C109.12                                                                                                                                                                                                                                                                                                                              | Type 2 diabetes mellitus                                      | C109312 | Type 2 diabetes mellitus with multiple complications        |
| C109.13                                                                                                                                                                                                                                                                                                                              | Type II diabetes mellitus                                     | C109400 | Non-insulin dependent diabetes mellitus with ulcer          |
| C109000                                                                                                                                                                                                                                                                                                                              | Non-insulin-dependent diabetes mellitus with renal comps      | C109411 | Type II diabetes mellitus with ulcer                        |
| C109011                                                                                                                                                                                                                                                                                                                              | Type II diabetes mellitus with renal complications            | C109412 | Type 2 diabetes mellitus with ulcer                         |
| C109012                                                                                                                                                                                                                                                                                                                              | Type 2 diabetes mellitus with renal complications             | C109500 | Non-insulin dependent diabetes mellitus with gangrene       |
| C109100                                                                                                                                                                                                                                                                                                                              | Non-insulin-dependent diabetes mellitus with ophthalmic comps | C109511 | Type II diabetes mellitus with gangrene                     |
| C109111                                                                                                                                                                                                                                                                                                                              | Type II diabetes mellitus with ophthalmic complications       | C109512 | Type 2 diabetes mellitus with gangrene                      |
| C109112                                                                                                                                                                                                                                                                                                                              | Type 2 diabetes mellitus with ophthalmic complications        | C109600 | Non-insulin-dependent diabetes mellitus with retinopathy    |
| <b>Obesity</b> = BMI>30. Values obtained from entity file: weight =13 and height = 14. Calculate BMI for every available weight measurement (using single height measurement). If BMI > 30 at any stage up to end of follow-up for individual patient then include in Obesity population. Index date is first occurrence of BMI >30. |                                                               |         |                                                             |
| <b>Cirrhosis:</b> Identified from READ codes/terms                                                                                                                                                                                                                                                                                   |                                                               |         |                                                             |
| 7609                                                                                                                                                                                                                                                                                                                                 | Open operations on oesophageal varices                        | J612.12 | Laennec's cirrhosis                                         |
| 7609300                                                                                                                                                                                                                                                                                                                              | Local ligation of oesophageal varices                         | J615.00 | Cirrhosis - non alcoholic                                   |
| 7609400                                                                                                                                                                                                                                                                                                                              | Open injection sclerotherapy to oesophageal varices           | J615.11 | Portal cirrhosis                                            |
| 7609y11                                                                                                                                                                                                                                                                                                                              | Tanner devascularisation for bleeding varices                 | J615100 | Multilobular portal cirrhosis                               |
| 7609z00                                                                                                                                                                                                                                                                                                                              | Open operation on oesophageal varices NOS                     | J615300 | Diffuse nodular cirrhosis                                   |
| 760C300                                                                                                                                                                                                                                                                                                                              | Fibreoptic endoscopic injection sclerotherapy oesoph varices  | J615400 | Fatty portal cirrhosis                                      |
| 760C500                                                                                                                                                                                                                                                                                                                              | Fibreoptic endoscopic banding of oesophageal varices          | J615500 | Hypertrophic portal cirrhosis                               |
| 760F300                                                                                                                                                                                                                                                                                                                              | Rigid oesophagoscopy injection sclerotherapy oesoph varices   | J615600 | Capsular portal cirrhosis                                   |
| 760F400                                                                                                                                                                                                                                                                                                                              | Rigid oesophagoscopy banding of oesophageal varices           | J615700 | Cardiac portal cirrhosis                                    |
| 761D800                                                                                                                                                                                                                                                                                                                              | Fibreopt endoscop rubber band ligation of upper GIT varices   | J615800 | Juvenile portal cirrhosis                                   |
| C310400                                                                                                                                                                                                                                                                                                                              | Glycogenosis with hepatic cirrhosis                           | J615812 | Indian childhood cirrhosis                                  |

|                                                                                                        |                                                                |         |                                                          |
|--------------------------------------------------------------------------------------------------------|----------------------------------------------------------------|---------|----------------------------------------------------------|
| C350012                                                                                                | Pigmentary cirrhosis of liver                                  | J615C00 | Xanthomatous portal cirrhosis                            |
| G85..11                                                                                                | Oesophageal varices                                            | J615D00 | Bacterial portal cirrhosis                               |
| G850.00                                                                                                | Oesophageal varices with bleeding                              | J615H00 | Infectious cirrhosis NOS                                 |
| G851.00                                                                                                | Oesophageal varices without bleeding                           | J615y00 | Portal cirrhosis unspecified                             |
| G852.00                                                                                                | Oesophageal varices in diseases EC                             | J615z00 | Non-alcoholic cirrhosis NOS                              |
| G852000                                                                                                | Oesophageal varices with bleeding in diseases EC               | J615z11 | Macronodular cirrhosis of liver                          |
| G852100                                                                                                | Oesophageal varices without bleeding in diseases EC            | J615z12 | Cryptogenic cirrhosis of liver                           |
| G852200                                                                                                | Oesophageal varices in cirrhosis of the liver                  | J615z13 | Cirrhosis of liver NOS                                   |
| G852300                                                                                                | Oesophageal varices in alcoholic cirrhosis of the liver        | J616.00 | Biliary cirrhosis                                        |
| G852z00                                                                                                | Oesophageal varices in diseases EC NOS                         | J616100 | Secondary biliary cirrhosis                              |
| G857.00                                                                                                | Gastric varices                                                | J616200 | Biliary cirrhosis of children                            |
| G858.00                                                                                                | Oesophageal varices NOS                                        | J616z00 | Biliary cirrhosis NOS                                    |
| J61..00                                                                                                | Cirrhosis and chronic liver disease                            | J623.00 | Portal hypertension                                      |
| J612.00                                                                                                | Alcoholic cirrhosis of liver                                   | J635600 | Toxic liver disease with fibrosis and cirrhosis of liver |
| J612.11                                                                                                | Florid cirrhosis                                               | Jyu7100 | [X]Other and unspecified cirrhosis of liver              |
| <b>Alcohol excess:</b> Identified from units per week from entity file (entity=5) and READ codes/terms |                                                                |         |                                                          |
| 136K.00                                                                                                | Alcohol intake above recommended sensible limits               | E231.00 | Chronic alcoholism                                       |
| 136S.00                                                                                                | Hazardous alcohol use                                          | E231z00 | Chronic alcoholism NOS                                   |
| 136T.00                                                                                                | Harmful alcohol use                                            | E23z.00 | Alcohol dependence syndrome NOS                          |
| 136W.00                                                                                                | Alcohol misuse                                                 | E250.00 | Nondependent alcohol abuse                               |
| 8H7p.00                                                                                                | Referral to community alcohol team                             | E250000 | Nondependent alcohol abuse, unspecified                  |
| 9NN2.00                                                                                                | Under care of community alcohol team                           | E250200 | Nondependent alcohol abuse, episodic                     |
| 9k1..00                                                                                                | Alcohol misuse - enhanced services administration              | E250z00 | Nondependent alcohol abuse NOS                           |
| 9k1A.00                                                                                                | Brief intervention for excessive alcohol consumption completed | Eu10211 | [X]Alcohol addiction                                     |
| E23..00                                                                                                | Alcohol dependence syndrome                                    | Eu10212 | [X]Chronic alcoholism                                    |
| E23..11                                                                                                | Alcoholism                                                     | ZV11300 | [V]Personal history of alcoholism                        |
| E23..12                                                                                                | Alcohol problem drinking                                       |         |                                                          |

Supplementary Table S2 – Total numbers of tests measured and individuals being tested

|                       | 2004    | 2005    | 2006    | 2007    | 2008    | 2009    | 2010    | 2011    | 2012    | 2013    | 2014    | 2015    | 2016    |
|-----------------------|---------|---------|---------|---------|---------|---------|---------|---------|---------|---------|---------|---------|---------|
| <b>ALT</b>            |         |         |         |         |         |         |         |         |         |         |         |         |         |
| Total tests           | 145,762 | 182,250 | 220,863 | 264,573 | 299,956 | 336,059 | 349,857 | 355,185 | 377,633 | 379,820 | 336,022 | 274,827 | 199,196 |
| Total people tested   | 101,485 | 126,562 | 152,516 | 183,196 | 206,761 | 228,380 | 239,920 | 246,920 | 261,544 | 264,206 | 233,037 | 193,654 | 141,885 |
| <b>AST</b>            |         |         |         |         |         |         |         |         |         |         |         |         |         |
| Total tests           | 62,414  | 69689   | 72,998  | 69218   | 75,502  | 81218   | 78,629  | 79997   | 71,305  | 53,714  | 44,064  | 36,542  | 18,363  |
| Total people tested   | 44,294  | 49158   | 51,781  | 48791   | 53,406  | 56756   | 56,085  | 57243   | 50,856  | 39,178  | 31,411  | 26,275  | 13,075  |
| <b>ALP</b>            |         |         |         |         |         |         |         |         |         |         |         |         |         |
| Total tests           | 199,350 | 241693  | 288,224 | 326253  | 368,076 | 411994  | 426,350 | 442311  | 461,329 | 454,319 | 405,753 | 332,655 | 236,886 |
| Total people tested   | 136,121 | 163894  | 192,150 | 218956  | 245,608 | 269713  | 280,957 | 292771  | 302,822 | 296,931 | 261,378 | 215,265 | 156,549 |
| <b>GGT</b>            |         |         |         |         |         |         |         |         |         |         |         |         |         |
| Total tests           | 78,572  | 92452   | 102,634 | 111127  | 119,522 | 127386  | 132,905 | 127210  | 116,707 | 102,085 | 74,190  | 61,516  | 40,953  |
| Total people tested   | 54,346  | 64692   | 71,192  | 78118   | 84,354  | 88723   | 93,147  | 90618   | 82,859  | 75,125  | 55,022  | 45,726  | 30,507  |
| <b>Bilirubin</b>      |         |         |         |         |         |         |         |         |         |         |         |         |         |
| Total tests           | 192,632 | 231683  | 275,631 | 311066  | 350,373 | 388612  | 399,189 | 411125  | 426,237 | 412,887 | 366,861 | 299,687 | 215,528 |
| Total people tested   | 134,046 | 160842  | 189,233 | 215296  | 241,713 | 264757  | 274,782 | 286590  | 295,722 | 288,212 | 254,867 | 210,081 | 152,916 |
| <b>Platelet count</b> |         |         |         |         |         |         |         |         |         |         |         |         |         |
| Total tests           | 269,019 | 318699  | 368,616 | 419187  | 475,732 | 524655  | 540,431 | 555732  | 589,239 | 557,555 | 495,158 | 389,745 | 279,714 |
| Total people tested   | 158,987 | 185336  | 211,828 | 238400  | 265,257 | 289243  | 300,868 | 314311  | 324,861 | 315,432 | 279,168 | 230,590 | 167,506 |

Supplementary Table S3 Prevalence of liver blood markers over time

|                           | 2004    | 2005    | 2006    | 2007    | 2008    | 2009    | 2010    | 2011    | 2012    | 2013    | 2014    | 2015    | 2016    |
|---------------------------|---------|---------|---------|---------|---------|---------|---------|---------|---------|---------|---------|---------|---------|
| <b>ALT</b>                |         |         |         |         |         |         |         |         |         |         |         |         |         |
| <i>All</i>                | 13.0%   | 14.7%   | 16.1%   | 17.8%   | 19.0%   | 20.0%   | 20.5%   | 20.9%   | 22.0%   | 23.2%   | 23.0%   | 23.1%   | 23.7%   |
|                           | 101,485 | 126,562 | 152,516 | 183,196 | 206,761 | 228,380 | 239,920 | 246,920 | 261,544 | 264,206 | 233,037 | 193,654 | 141,885 |
| <i>No risk factor</i>     | 10.2%   | 11.5%   | 12.3%   | 13.7%   | 14.6%   | 15.4%   | 15.6%   | 15.9%   | 16.7%   | 17.5%   | 17.4%   | 17.3%   | 17.9%   |
|                           | 58,099  | 71,085  | 82,630  | 97,925  | 109,206 | 119,415 | 122,910 | 125,077 | 131,327 | 131,491 | 115,211 | 93,323  | 69,323  |
| <i>Alcohol excess</i>     | 15.3%   | 17.2%   | 19.2%   | 21.5%   | 23.1%   | 24.4%   | 25.1%   | 25.6%   | 27.1%   | 28.3%   | 28.0%   | 27.4%   | 28.3%   |
|                           | 15,571  | 19,838  | 24,616  | 30,304  | 34,840  | 38,992  | 41,558  | 42,907  | 45,955  | 46,207  | 41,346  | 34,669  | 23,270  |
| <i>Obesity</i>            | 21.9%   | 24.6%   | 27.2%   | 29.2%   | 30.6%   | 31.6%   | 32.4%   | 32.5%   | 33.9%   | 35.4%   | 35.0%   | 35.1%   | 35.7%   |
|                           | 25,460  | 33,357  | 42,787  | 53,140  | 61,862  | 70,159  | 76,530  | 80,517  | 86,275  | 88,493  | 79,136  | 68,224  | 50,029  |
| <i>Type 2 diabetes</i>    | 56.1%   | 61.0%   | 64.4%   | 67.9%   | 68.4%   | 68.1%   | 68.9%   | 67.4%   | 68.5%   | 70.7%   | 68.4%   | 68.6%   | 68.8%   |
|                           | 10,271  | 13,741  | 17,680  | 21,964  | 24,670  | 27,140  | 29,564  | 31,100  | 33,335  | 34,909  | 31,408  | 27,066  | 20,317  |
| <i>All 3 risk factors</i> | 59.1%   | 63.9%   | 68.4%   | 71.7%   | 72.4%   | 71.9%   | 71.5%   | 70.7%   | 70.3%   | 73.0%   | 71.3%   | 70.2%   | 71.1%   |
|                           | 874     | 1247    | 1685    | 2186    | 2613    | 3035    | 3430    | 3769    | 3983    | 4260    | 3931    | 3510    | 2436    |
| <b>AST</b>                |         |         |         |         |         |         |         |         |         |         |         |         |         |
| <i>All</i>                | 5.7%    | 5.7%    | 5.5%    | 4.7%    | 4.9%    | 5.0%    | 4.8%    | 4.8%    | 4.3%    | 3.4%    | 3.1%    | 3.1%    | 2.2%    |
|                           | 44,294  | 49,158  | 51,781  | 48,791  | 53,406  | 56,756  | 56,085  | 57,243  | 50,856  | 39,178  | 31,411  | 26,275  | 13,075  |
| <i>No risk factor</i>     | 4.4%    | 4.5%    | 4.1%    | 3.6%    | 3.7%    | 3.7%    | 3.6%    | 3.7%    | 3.3%    | 2.6%    | 2.3%    | 2.3%    | 1.6%    |
|                           | 25,237  | 27,674  | 27,556  | 25,603  | 27,614  | 28,920  | 28,504  | 29,130  | 25,902  | 19,882  | 15,406  | 12,526  | 6,017   |
| <i>Alcohol excess</i>     | 6.5%    | 6.5%    | 6.5%    | 5.5%    | 5.6%    | 5.7%    | 5.5%    | 5.5%    | 4.8%    | 3.9%    | 3.6%    | 3.8%    | 3.0%    |
|                           | 6,672   | 7,446   | 8,311   | 7,708   | 8,497   | 9,129   | 9,123   | 9,214   | 8,206   | 6,298   | 5,368   | 4,791   | 2,503   |
| <i>Obesity</i>            | 9.8%    | 9.7%    | 9.6%    | 8.2%    | 8.4%    | 8.3%    | 7.8%    | 7.6%    | 6.6%    | 5.3%    | 4.8%    | 4.8%    | 3.4%    |
|                           | 11,411  | 13,137  | 15,047  | 14,942  | 17,073  | 18,511  | 18,354  | 18,929  | 16,709  | 13,124  | 10,921  | 9,327   | 4,740   |
| <i>Type 2 diabetes</i>    | 24.3%   | 23.6%   | 22.8%   | 18.9%   | 18.9%   | 18.4%   | 16.8%   | 16.0%   | 13.6%   | 10.3%   | 9.1%    | 9.6%    | 6.5%    |
|                           | 4,444   | 5,309   | 6,257   | 6,104   | 6,808   | 7,318   | 7,228   | 7,387   | 6,599   | 5,099   | 4,155   | 3,780   | 1,919   |
| <i>All 3 risk factors</i> | 24.9%   | 24.4%   | 22.6%   | 18.9%   | 18.7%   | 18.0%   | 16.5%   | 15.3%   | 12.7%   | 9.9%    | 9.2%    | 9.6%    | 7.4%    |
|                           | 369     | 477     | 557     | 577     | 676     | 759     | 793     | 813     | 721     | 576     | 506     | 478     | 252     |
| <b>ALP</b>                |         |         |         |         |         |         |         |         |         |         |         |         |         |

|                           |         |         |         |         |         |         |         |         |         |         |         |         |         |
|---------------------------|---------|---------|---------|---------|---------|---------|---------|---------|---------|---------|---------|---------|---------|
| <i>All</i>                | 17.4%   | 19.0%   | 20.3%   | 21.3%   | 22.6%   | 23.7%   | 24.0%   | 24.8%   | 25.5%   | 26.0%   | 25.8%   | 25.6%   | 26.2%   |
|                           | 136,121 | 163,894 | 192,150 | 218,956 | 245,608 | 269,713 | 280,957 | 292,771 | 302,822 | 296,931 | 261,378 | 215,265 | 156,549 |
| <i>No risk factor</i>     | 13.8%   | 14.9%   | 15.6%   | 16.4%   | 17.4%   | 18.2%   | 18.3%   | 19.0%   | 19.5%   | 19.9%   | 19.7%   | 19.4%   | 19.9%   |
|                           | 78,382  | 92,690  | 104,627 | 117,407 | 129,995 | 141,235 | 144,684 | 149,282 | 153,272 | 149,168 | 130,327 | 104,727 | 76,926  |
| <i>Alcohol excess</i>     | 20.0%   | 21.7%   | 23.8%   | 25.0%   | 26.6%   | 27.9%   | 28.6%   | 29.4%   | 30.5%   | 31.0%   | 30.7%   | 29.9%   | 31.1%   |
|                           | 20,355  | 25,039  | 30,447  | 35,275  | 40,123  | 44,632  | 47,212  | 49,230  | 51,624  | 50,602  | 45,304  | 37,836  | 25,565  |
| <i>Obesity</i>            | 29.5%   | 31.9%   | 34.3%   | 35.1%   | 36.8%   | 37.7%   | 38.1%   | 38.7%   | 39.2%   | 39.7%   | 39.1%   | 38.8%   | 39.2%   |
|                           | 34,314  | 43,222  | 53,982  | 63,964  | 74,331  | 83,756  | 89,904  | 95,755  | 99,898  | 99,094  | 88,395  | 75,373  | 54,922  |
| <i>Type 2 diabetes</i>    | 73.5%   | 77.4%   | 79.6%   | 80.4%   | 81.0%   | 80.6%   | 80.2%   | 79.3%   | 78.6%   | 78.2%   | 75.5%   | 75.1%   | 75.0%   |
|                           | 13,458  | 17,429  | 21,845  | 26,018  | 29,210  | 32,115  | 34,420  | 36,568  | 38,245  | 38,590  | 34,647  | 29,619  | 22,161  |
| <i>All 3 risk factors</i> | 75.0%   | 79.1%   | 82.1%   | 82.0%   | 82.7%   | 81.9%   | 80.8%   | 80.8%   | 78.9%   | 78.7%   | 77.1%   | 75.5%   | 77.2%   |
|                           | 1,110   | 1,544   | 2,021   | 2,501   | 2,986   | 3,455   | 3,876   | 4,305   | 4,471   | 4,588   | 4,251   | 3,774   | 2,645   |
| <b>GGT</b>                |         |         |         |         |         |         |         |         |         |         |         |         |         |
| <i>All</i>                | 7.0%    | 7.5%    | 7.5%    | 7.6%    | 7.8%    | 7.8%    | 8.0%    | 7.7%    | 7.0%    | 6.6%    | 5.4%    | 5.4%    | 5.1%    |
|                           | 54,346  | 64,692  | 71,192  | 78,118  | 84,354  | 88,723  | 93,147  | 90,618  | 82,859  | 75,125  | 55,022  | 45,726  | 30,507  |
| <i>No risk factor</i>     | 5.3%    | 5.6%    | 5.5%    | 5.5%    | 5.6%    | 5.6%    | 5.7%    | 5.5%    | 5.0%    | 4.7%    | 3.9%    | 3.9%    | 3.7%    |
|                           | 29,868  | 34,865  | 36,661  | 39,595  | 42,214  | 43,632  | 45,103  | 43,616  | 39,378  | 35,625  | 25,434  | 20,846  | 14,408  |
| <i>Alcohol excess</i>     | 9.7%    | 10.3%   | 10.8%   | 11.0%   | 11.3%   | 11.5%   | 11.7%   | 11.2%   | 10.4%   | 9.6%    | 8.3%    | 7.9%    | 7.3%    |
|                           | 9,837   | 11,909  | 13,845  | 15,572  | 17,021  | 18,307  | 19,323  | 18,790  | 17,571  | 15,738  | 12,271  | 9,922   | 5,971   |
| <i>Obesity</i>            | 11.8%   | 12.8%   | 12.9%   | 12.6%   | 12.8%   | 12.6%   | 12.8%   | 12.1%   | 10.9%   | 10.2%   | 8.4%    | 8.5%    | 7.7%    |
|                           | 13,754  | 17,296  | 20,350  | 23,024  | 25,877  | 27,954  | 30,300  | 29,929  | 27,680  | 25,385  | 19,030  | 16,469  | 10,731  |
| <i>Type 2 diabetes</i>    | 28.6%   | 29.3%   | 28.0%   | 27.1%   | 26.2%   | 25.1%   | 25.3%   | 23.7%   | 20.7%   | 19.2%   | 14.8%   | 15.1%   | 13.1%   |
|                           | 5,232   | 6,601   | 7,693   | 8,757   | 9,456   | 10,007  | 10,855  | 10,946  | 10,061  | 9,484   | 6,796   | 5,942   | 3,879   |
| <i>All 3 risk factors</i> | 32.2%   | 33.8%   | 33.0%   | 32.2%   | 31.3%   | 31.1%   | 30.1%   | 29.4%   | 24.6%   | 22.6%   | 18.3%   | 17.8%   | 14.8%   |
|                           | 476     | 659     | 812     | 982     | 1,131   | 1,314   | 1,443   | 1,568   | 1,394   | 1,319   | 1,009   | 891     | 507     |
| <b>Bilirubin</b>          |         |         |         |         |         |         |         |         |         |         |         |         |         |
| <i>All</i>                | 17.2%   | 18.6%   | 20.0%   | 20.9%   | 22.2%   | 23.2%   | 23.5%   | 24.3%   | 24.9%   | 25.3%   | 25.2%   | 25.0%   | 25.6%   |
|                           | 134,046 | 160,842 | 189,233 | 215,296 | 241,713 | 264,757 | 274,782 | 286,590 | 295,722 | 288,212 | 254,867 | 210,081 | 152,916 |
|                           | 13.5%   | 14.6%   | 15.3%   | 16.1%   | 17.0%   | 17.8%   | 17.8%   | 18.4%   | 18.9%   | 19.2%   | 19.1%   | 18.8%   | 19.3%   |

|                           |                  |                  |                  |                  |                  |                  |                  |                  |                  |                  |                  |                  |                  |
|---------------------------|------------------|------------------|------------------|------------------|------------------|------------------|------------------|------------------|------------------|------------------|------------------|------------------|------------------|
| <i>No risk factor</i>     | 76,925           | 90,589           | 102,695          | 114,978          | 127,452          | 137,983          | 140,694          | 145,318          | 148,912          | 143,914          | 126,200          | 101,520          | 74,600           |
| <i>Alcohol excess</i>     | 19.8%<br>20,174  | 21.5%<br>24,766  | 23.5%<br>30,144  | 24.7%<br>34,890  | 26.4%<br>39,753  | 27.6%<br>44,116  | 28.2%<br>46,549  | 29.0%<br>48,609  | 30.0%<br>50,790  | 30.3%<br>49,536  | 30.2%<br>44,537  | 29.4%<br>37,217  | 30.7%<br>25,195  |
| <i>Obesity</i>            | 29.1%<br>33,896  | 31.4%<br>42,574  | 33.9%<br>53,306  | 34.7%<br>63,125  | 36.3%<br>73,377  | 37.2%<br>82,584  | 37.4%<br>88,397  | 38.0%<br>94,097  | 38.5%<br>97,916  | 38.7%<br>96,601  | 38.3%<br>86,706  | 38.0%<br>73,942  | 38.5%<br>53,945  |
| <i>Type 2 diabetes</i>    | 73.2%<br>13,402  | 76.9%<br>17,306  | 79.1%<br>21,709  | 79.9%<br>25,850  | 80.5%<br>29,030  | 80.0%<br>31,878  | 79.5%<br>34,108  | 78.7%<br>36,294  | 77.7%<br>37,812  | 77.0%<br>38,009  | 74.8%<br>34,346  | 74.5%<br>29,378  | 74.4%<br>21,978  |
| <i>All 3 risk factors</i> | 74.8%<br>1,107   | 78.7%<br>1,536   | 81.6%<br>2,010   | 81.8%<br>2,494   | 82.4%<br>2,976   | 81.6%<br>3,443   | 80.5%<br>3,862   | 80.4%<br>4,284   | 78.2%<br>4,430   | 77.9%<br>4,544   | 76.6%<br>4,222   | 75.0%<br>3,749   | 76.8%<br>2,629   |
| <b>Platelets</b>          |                  |                  |                  |                  |                  |                  |                  |                  |                  |                  |                  |                  |                  |
| <i>All</i>                | 20.3%<br>158,987 | 21.5%<br>185,336 | 22.4%<br>211,828 | 23.2%<br>238,400 | 24.4%<br>265,257 | 25.4%<br>289,243 | 25.7%<br>300,868 | 26.6%<br>314,311 | 27.4%<br>324,861 | 27.6%<br>315,432 | 27.6%<br>279,168 | 27.5%<br>230,590 | 28.0%<br>167,506 |
| <i>No risk factor</i>     | 18.3%<br>104,008 | 19.1%<br>118,472 | 19.5%<br>130,674 | 20.1%<br>144,262 | 21.0%<br>157,524 | 21.8%<br>168,847 | 21.8%<br>172,317 | 22.5%<br>177,447 | 23.0%<br>180,888 | 23.1%<br>173,265 | 22.9%<br>151,378 | 22.4%<br>121,000 | 22.9%<br>88,638  |
| <i>Alcohol excess</i>     | 18.6%<br>18,994  | 19.9%<br>22,933  | 21.4%<br>27,424  | 22.5%<br>31,684  | 24.0%<br>36,207  | 25.2%<br>40,327  | 26.0%<br>42,991  | 27.0%<br>45,170  | 28.4%<br>48,143  | 29.0%<br>47,396  | 29.1%<br>42,957  | 29.0%<br>36,654  | 30.0%<br>24,657  |
| <i>Obesity</i>            | 28.7%<br>33,393  | 30.6%<br>41,452  | 32.4%<br>50,954  | 33.1%<br>60,244  | 34.7%<br>70,172  | 35.9%<br>79,767  | 36.5%<br>86,087  | 37.5%<br>92,765  | 38.3%<br>97,383  | 38.6%<br>96,496  | 38.6%<br>87,227  | 38.9%<br>75,562  | 39.4%<br>55,216  |
| <i>Type 2 diabetes</i>    | 47.9%<br>8,764   | 51.1%<br>11,511  | 54.4%<br>14,932  | 56.1%<br>18,153  | 58.3%<br>21,031  | 59.5%<br>23,689  | 61.9%<br>26,553  | 63.2%<br>29,146  | 64.0%<br>31,107  | 64.4%<br>31,793  | 63.7%<br>29,233  | 65.3%<br>25,752  | 66.3%<br>19,593  |
| <i>All 3 risk factors</i> | 43.9%<br>650     | 48.6%<br>949     | 51.9%<br>1,278   | 52.9%<br>1,614   | 56.0%<br>2,020   | 56.9%<br>2,403   | 59.1%<br>2,835   | 61.2%<br>3,261   | 61.4%<br>3,477   | 63.0%<br>3,674   | 62.7%<br>3,455   | 64.2%<br>3,210   | 67.8%<br>2,323   |

Supplementary Figure S1 Prevalence of liver marker testing over time by the subgroups: no liver risk factors, Type 2 diabetes, excess alcohol consumption and obesity

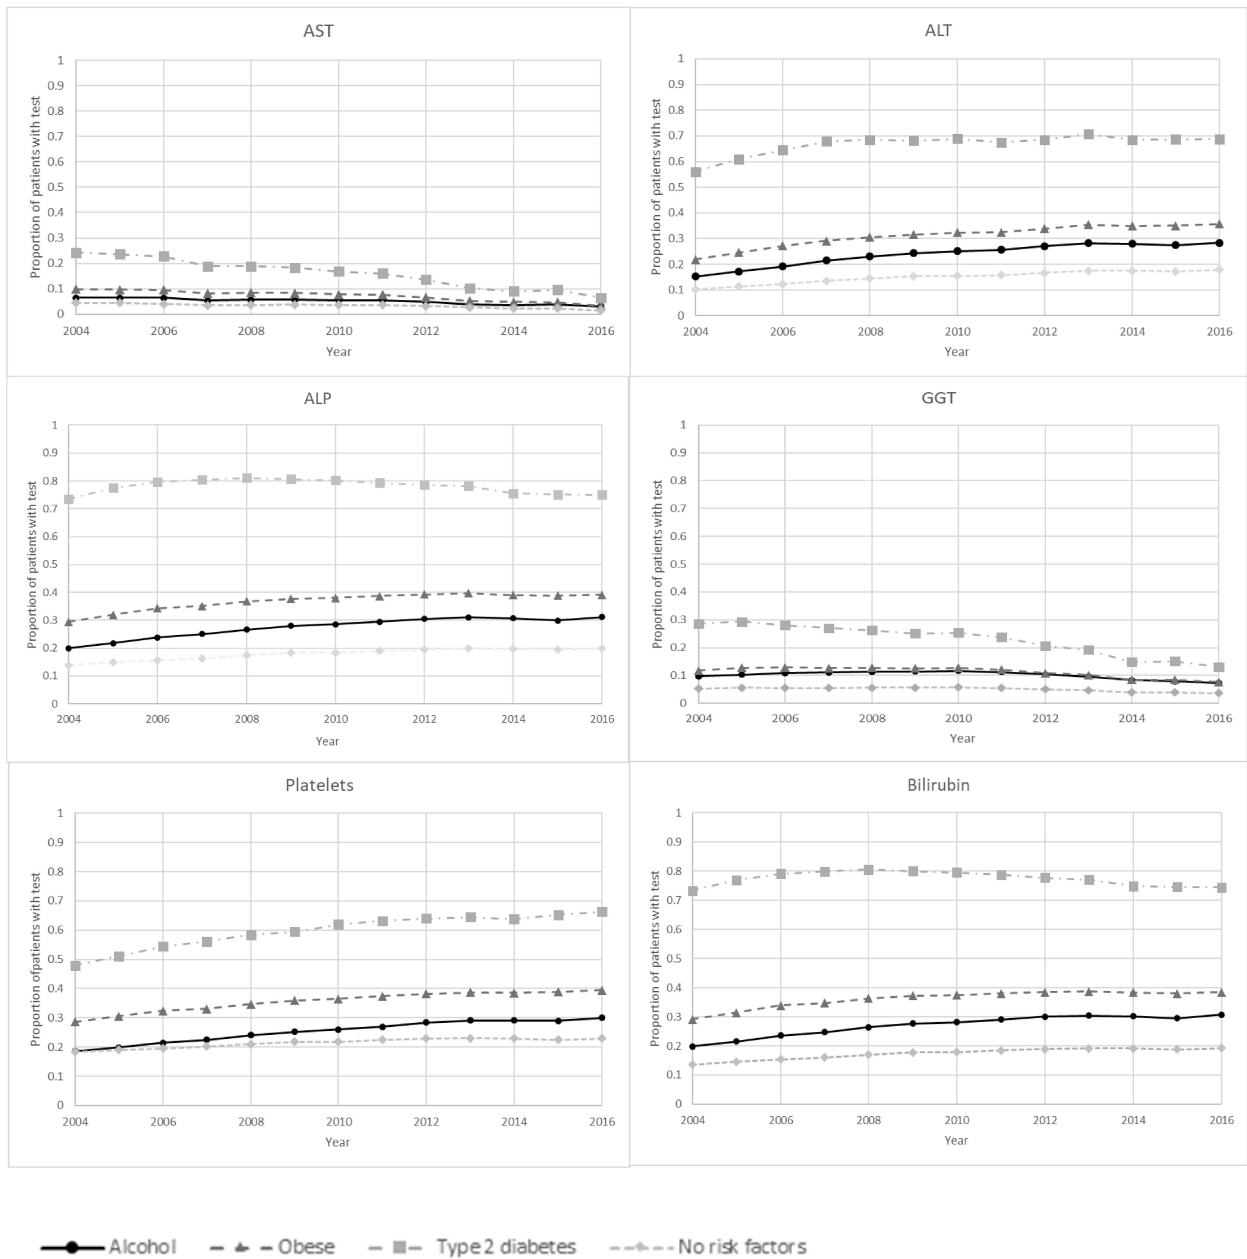

Supplement: bmjopen-2021-058967supp001_data_supplement.pdf [file bmjopen-2021-058967supp001_data_supplement.pdf]
